# Supplementary material for: Longitudinal multi-omics analyses link gut microbiome dysbiosis with recurrent urinary tract infections in women
Source: Springer Nature journal article supplement (doi:10.1038/s41564-022-01107-x), 2022-05-02
Supplement: MOESM4 [file 41564_2022_1107_MOESM4_ESM.xlsx]

## Sheet: F2acd
ID	Cohort	Bacteroidaceae	Rikenellaceae	Ruminococcaceae	Porphyromonadaceae	Eubacteriaceae	Prevotellaceae	Verrucomicrobiaceae	Butyrate_Q5	Butyrate_Q25	Butyrate_Q50	Butyrate_Q75	Butyrate_Q95	Richness_Q5	Richness_Q25	Richness_Q50	Richness_Q75	Richness_Q95	UTIs	abx_courses
1	Control	32.2608	22.8546	20.3831	7.33388	6.54296	0.00681615	3.55072	2.93011	11.3474	13.5519	17.2473	23.9129	33.4	51	55	64	67.8	0	0
2	Control	32.1392	19.8867	13.1613	2.79216	14.6123	0.102092	6.57719	4.61018	8.57609	21.6764	32.7426	46.071	40	46	48	52	68.2	0	3
3	Control	56.9198	0	4.52409	9.61554	0.374476	0.0239854	15.1225	0	0	0	0.33737	5.94831	28.6	30	35	38	43.4	0	1
4	rUTI	30.1731	44.5448	6.6672	1.05839	1.84994	0.000739	3.24473	1.37784	4.46249	6.7595	9.05494	11.0132	35.9	38.5	42.5	44.75	53.2	0	0
5	rUTI	47.7376	21.5853	10.9347	4.68902	11.3541	0.000258333	1.54764	1.94799	3.86304	5.45534	7.03729	10.3081	22.4	33.5	40.5	47.5	57.3	2	3
6	Control	44.3778	7.54623	11.6323	3.85227	2.57331	0	0.637596	1.18617	6.12876	7.95724	30.7922	44.7805	27.5	30.5	37	47	62	0	0
7	Control	33.6839	17.2891	16.0912	6.4882	9.23609	0.0169054	2.85313	6.04337	11.1927	16.0162	19.8114	34.4156	31.8	44	57	64	68.6	0	0
8	rUTI	71.5767	0.34925	5.34846	4.70852	8.41128	0.00280714	2.09834	3.03013	7.50044	10.4304	11.9492	15.4767	17.85	40.25	47.5	50	55.1	3	3
9	Control	17.2909	10.8087	16.3448	3.85221	1.83345	21.2846	9.52387	3.35831	5.7271	8.34183	13.7064	25.3928	21.5	31	47	64.5	77.8	0	0
10	rUTI	48.83	9.07438	8.76866	9.81512	8.12902	0.0128292	8.24225	1.57976	2.52804	3.46506	4.34045	6.59746	39.55	44	45	49	64.05	0	0
11	rUTI	41.5982	16.4497	15.3915	10.7389	2.21968	0.00794	0.597393	3.04602	3.95347	5.75375	8.48414	10.0528	36	45.5	53	57	63.5	1	1
12	rUTI	79.0359	8.58794	2.88703	2.04836	2.63216	0.000183077	0	0.447774	1.84043	3.29715	5.20676	7.30184	26.6	43	47	56	64.4	3	5
13	Control	51.1361	20.0627	13.2165	5.2885	3.29434	0.0146354	1.82603	4.25255	6.66457	12.8607	14.9315	29.1138	30	51	55	60	66.2	0	0
14	Control	46.4238	16.2845	13.2186	9.10928	5.74702	0	0	12.7696	14.2588	16.1203	17.9819	19.4711	42.25	43.25	44.5	45.75	46.75	0	0
15	rUTI	87.8719	0.0720085	5.01038	0.0365985	2.92855	0.000553077	0.00465769	2.78429	3.90295	8.80731	11.8943	20.9168	17.2	19	33	44	54.8	1	2
16	Control	18.2019	4.14903	45.9981	1.69267	1.50435	19.0955	0	17.9829	18.9504	20.1598	23.6823	26.5003	53.2	54	55	56	56.8	0	0
17	rUTI	75.1125	10.6876	1.11114	0.000278333	3.49993	0	0	0.713792	0.880635	2.1912	4.81999	14.512	31.1	33	39.5	41.5	47.05	0	0
18	rUTI	38.1986	14.4238	13.8292	9.3138	15.4335	0.0528947	0.00634176	9.25219	12.9782	15.5124	19.8696	23.4873	32	47	55	61	66.2	4	5
19	Control	60.2664	23.265	8.51517	3.19629	1.02485	0.00194083	0.0101142	0.949947	2.80997	4.1958	7.69819	13.8453	23.75	34.5	36	36.25	44.9	0	1
20	rUTI	42.9836	15.1363	12.6304	15.199	6.35923	0.00286381	1.44289	3.08734	6.71144	10.7734	13.4451	21.9598	35	42	58	63	66	4	5
21	Control	58.2778	10.1755	15.1943	3.62022	4.84115	0.00303364	3.21179	6.2038	9.1052	10.0041	12.9256	15.7848	30	40.5	47	50	56.5	0	1
22	rUTI	55.152	6.14172	7.92817	20.4279	0.36013	0	0	1.22064	2.21366	6.45202	13.7008	18.8569	21.65	28	31	34	37.35	0	2
23	rUTI	86.2474	0.000261875	0.824348	1.93827	0.00021125	0.00459312	3.16574	0	0	0	0	0.000845	8	16	26	34.5	37.5	4	3
24	rUTI	73.55	4.28905	5.00003	5.78699	1.69591	0.00685714	0.076	0.896435	1.75744	2.5858	6.21609	17.7166	35.95	44.75	49.5	57	64.95	1	0
25	rUTI	54.0851	28.303	4.00122	8.70377	0.946914	0.00126333	0.0281775	1.94133	2.54096	3.1673	4.02752	7.24579	24.7	33	37.5	41.75	49.35	0	0
26	Control	33.1365	17.5195	10.1795	10.3463	4.57082	2.54874	12.7522	3.54622	7.91731	9.60445	11.4019	14.8724	48.55	51.25	57	68.25	73.35	0	1
27	Control	25.6648	6.98539	16.4604	7.80595	4.40349	26.4813	1.18456	9.11233	12.3916	17.3239	23.0644	33.9838	36	44.5	53	56.25	60.6	0	1
28	Control	7.03426	10.0666	24.2891	1.32612	1.77263	30.8087	0.334088	7.17186	15.73	21.6023	28.0579	39.8905	36.05	45	57	67.25	70.55	0	0
29	Control	50.0867	15.5551	17.9312	2.837	7.81776	0.00218077	2.03051	6.6093	8.13433	13.8131	15.07	24.6906	34.6	45	47	71	77	0	1
30	rUTI	63.1306	12.9093	7.38847	6.69433	1.13709	0	0	7.03044	7.38554	7.82942	8.27329	8.62839	40.05	40.25	40.5	40.75	40.95	1	2
31	Control	59.9399	8.56622	6.79553	5.33727	2.43968	11.9711	0	1.14404	3.28538	5.28056	7.97815	14.86	42.55	46	49	55.25	59.45	0	1

## Sheet: F2b
Taxon	Taxon_level	rel_abundance	effect	pvalue
Bacteroidaceae	family	50.7456	0.254562	0.0138962
Bacteroides	genus	50.7456	0.254562	0.0272134
B. cellulosilyticus	species	1.1992	0.0712896	0.262112
B. fragilis	species	1.50863	0.071046	0.314256
B. massiliensis	species	1.92146	-0.103605	0.262112
B. ovatus	species	4.61039	0.0989918	0.314256
B. thetaiotaomicron	species	1.73778	0.0541749	0.371584
A. senegalensis	species	0.0623734	-0.0184363	0.262112
Ruminococcaceae	family	10.6256	-0.127234	0.0222638
Faecalibacterium	genus	6.28689	-0.0928748	0.18795
Subdoligranulum	genus	3.79397	-0.0739015	0.223278
F. prausnitzii	species	6.28689	-0.0928748	0.262112
S. unclassified	species	3.75203	-0.0703983	0.349514
Porphyromonas	genus	0.021883	-0.00426406	0.292022
E. hallii	species	0.0596448	-0.0152072	0.0552272
E. rectale	species	2.73129	-0.0664976	0.290402
Prevotellaceae	family	2.75217	-0.129301	0.126392
Prevotella	genus	2.26682	-0.101778	0.292022
Verrucomicrobiaceae	family	2.65089	-0.0781279	0.126392
Akkermansia	genus	2.65089	-0.0781279	0.18795
A. muciniphila	species	2.65089	-0.0781279	0.262112
Anaerostipes	genus	0.0314116	0.00738302	0.292022
Blautia	genus	0.391014	-0.0169195	0.248935
A. hadrus	species	0.029351	0.00812285	0.356436
R. torques	species	0.241646	-0.0233327	0.170264
D. formicigenerans	species	0.0221338	-0.00529507	0.371584
L. bacterium_8_1_57FAA	species	0.0389811	-0.00559346	0.341376
Bacteroidales_noname	family	0.585577	-0.0779353	0.00173547
Bacteroidales_noname	genus	0.585577	-0.0779353	0.00339862
B. bacterium_ph8	species	0.585577	-0.0779353	0.00744804
Parasutterella	genus	0.0990317	-0.0183819	0.18795
P. excrementihominis	species	0.0990317	-0.0183819	0.262112
Desulfovibrionaceae	family	0.380429	-0.0274545	0.126392
Bilophila	genus	0.35886	-0.0292342	0.18795
B. unclassified	species	0.331353	-0.0283377	0.262112
Coriobacteriaceae	family	0.186028	-0.0136364	0.126392
Adlercreutzia	genus	0.00691496	-0.00419434	0.18795
Collinsella	genus	0.150633	-0.0140988	0.248935
A. equolifaciens	species	0.00691496	-0.00419434	0.262112
Methanobacteriaceae	family	0.0649691	0.00720631	0.126392
Methanobrevibacter	genus	0.0649691	0.00720631	0.223278
M. unclassified	species	0.0193645	0.00388007	0.314256
Pasteurellaceae	family	0.0357477	0.00665149	0.126392
Haemophilus	genus	0.0357477	0.00665149	0.223278
H. parainfluenzae	species	0.0356432	0.0066106	0.314256

## Sheet: F2e
Cohort	Prop_ecoli_zeros	ecoli_Q5	ecoli_Q25	ecoli_Q50	ecoli_Q75	ecoli_Q95
Control	0.4	0.010588	0.0571825	0.223975	0.88527	4.86173
rUTI	0.467	0.007948	0.04428	0.17493	0.51185	2.46817
