# Supplementary material for: Longitudinal multi-omics analyses link gut microbiome dysbiosis with recurrent urinary tract infections in women
Source: Springer Nature journal article supplement (doi:10.1038/s41564-022-01107-x), 2022-05-02
Supplement: MOESM5 [file 41564_2022_1107_MOESM5_ESM.xlsx]

## Sheet: F3a
ref	pat_count	everinurine	phylogroup	strID
Esch_coli_2013C-4282	1	No	cladeI	NA
Esch_coli_ECONIH1	2	No	F	NA
Esch_coli_1428	1	No	F	NA
Esch_coli_CE10	1	No	F	NA
Esch_coli_2012C-4502	2	No	G	NA
Esch_coli_MSHS_133	1	No	G	NA
Esch_coli_FDAARGOS_144	2	No	B2	NA
Esch_coli_SaT040	1	No	B2	NA
Esch_coli_SA186	2	No	B2	NA
Esch_coli_strain_Z247	2	No	B2	NA
Esch_coli_JJ1886	1	No	B2	NA
Esch_coli_MVAST0167	1	No	B2	1
Esch_coli_UM146	3	Yes	B2	2
Esch_coli_PA45B	3	Yes	B2	3
Esch_coli_1105	1	Yes	B2	4
Esch_coli_AR_0017	2	No	B2	NA
Esch_coli_317	1	No	B2	NA
Esch_coli_536	2	No	B2	NA
Esch_coli_clone_D_i14	8	Yes	B2	5
Esch_coli_LF82	10	Yes	B2	6
Esch_coli_NGF1	1	No	B2	7
Esch_coli_FDAARGOS_536	1	No	B2	8
Esch_coli_MCJCHV-1	6	Yes	B2	9
Esch_coli_FHI_NMBU_03	1	No	B2	NA
Esch_coli_CFSAN061770	2	No	D	NA
Esch_coli_118UI	9	Yes	D	1
Esch_coli_C4	1	No	D	2
Esch_coli_EC-1639	1	No	D	NA
Esch_coli_CFSAN018748	2	Yes	D	3
Esch_coli_ST2747	2	Yes	D	4
Esch_coli_Ecol_545	1	No	D	5
Esch_coli_A1_136	4	No	D	6
Esch_coli_28Eco12	2	Yes	D	7
Esch_coli_1190	6	Yes	D	8
Esch_coli_Santai	1	Yes	E	1
Esch_coli_EC1515	1	Yes	E	2
Esch_coli_DSM_103246	1	No	E	3
Esch_coli_NCTC9112	1	No	E	NA
Shig_dysenteriae_80-547	2	No	E	4
Esch_coli_f974b26a-5e81-11e8-bf7f-3c4a9275d6c8	2	No	A	1
Esch_coli_ECONIH4	2	No	A	NA
Esch_coli_08-00022	3	No	A	2
Esch_coli_S1	3	No	A	3
Esch_coli_NCTC9066	1	No	A	4
Esch_coli_ST540_GCF_000597845.1	2	No	A	NA
Esch_coli_26561	1	No	A	5
Esch_coli_1283	1	No	A	NA
Esch_coli_VR50	5	No	A	NA
Esch_coli_NCTC9087	3	No	A	6
Esch_coli_NCTC10973	1	No	A	NA
Esch_coli_str_TO73	1	No	A	NA
Esch_coli_F5505-C1	1	No	A	NA
Esch_coli_HS30-1	1	No	A	7
Esch_coli_14EC001	1	No	A	NA
Esch_coli_NCTC9080	6	No	A	NA
Esch_coli_FORC_082	1	No	A	8
Esch_coli_BLK9	1	No	A	9
Esch_coli_S3	1	No	B1	1
Esch_coli_L725	3	No	B1	2
Esch_coli_AMSHJX01	1	No	B1	NA
Esch_coli_1943	1	No	B1	3
Esch_coli_120899	1	No	B1	4
Esch_coli_S42	1	Yes	B1	5
Esch_coli_KSC9	1	No	B1	NA
Esch_coli_H3	1	No	B1	6
Esch_coli_HB-Coli0	1	No	B1	7
Esch_coli_S56	1	No	B1	8
Esch_coli_H15	1	No	B1	9
Esch_coli_WAT	1	No	B1	NA
Esch_coli_D5	5	Yes	B1	10
Esch_coli_IAI1	2	No	B1	11
Esch_coli_600468	1	No	B1	12

## Sheet: F3b
ID	day	event	type
5	-1	stool	NA
5	0	urt	Esch_coli_LF82
5	32	stool	NA
5	61	stool	NA
5	95	stool	NA
5	123	stool	NA
5	153	stool	NA
5	171	abx	F
5	172	stool	NA
5	172	urine	NA
5	186	stool	NA
5	201	stool	NA
5	215	stool	NA
5	244	stool	NA
5	284	stool	NA
5	292	stool	NA
5	292	uop	Esch_coli_S42
5	292	urp	Esch_coli_S42
5	305	abx	S
5	306	stool	NA
5	312	stool	NA
5	319	stool	NA
5	347	stool	NA
5	368	stool	NA
8	0	urine	NA
8	15	urt	Esch_coli_clone_D_i14
8	15	urt	Esch_coli_1190
8	15	rectal	NA
8	19	abx	F
8	33	stool	NA
8	45	stool	Esch_coli_clone_D_i14
8	66	stool	Esch_coli_clone_D_i14
8	69	rot	Esch_coli_clone_D_i14
8	69	uot	Esch_coli_clone_D_i14
8	77	abx	F
8	81	stool	NA
8	96	stool	Esch_coli_clone_D_i14
8	130	stool	Esch_coli_1943
8	160	stool	Esch_coli_clone_D_i14
8	160	stool	Esch_coli_IAI1
8	188	stool	Esch_coli_clone_D_i14
8	214	stool	Esch_coli_clone_D_i14
8	250	stool	Esch_coli_NCTC9087
8	250	stool	Esch_coli_clone_D_i14
8	286	stool	Esch_coli_MCJCHV-1
8	335	stool	NA
8	341	abx	F
8	346	stool	NA
8	371	stool	Esch_coli_LF82
8	371	stool	Esch_coli_clone_D_i14
11	0	urt	Esch_coli_clone_D_i14
11	0	rectal	NA
11	29	stool	Esch_coli_NGF1
11	55	stool	Esch_coli_NGF1
11	89	stool	Esch_coli_1190
11	100	rot	Esch_coli_1190
11	100	uot	Esch_coli_1190
11	101	stool	NA
11	102	abx	S
11	117	stool	NA
11	132	stool	Esch_coli_1190
11	145	stool	Esch_coli_1190
11	174	stool	Esch_coli_H3
11	174	stool	Esch_coli_1190
11	208	stool	Esch_coli_1190
11	208	stool	Esch_coli_f974b26a-5e81-11e8-bf7f-3c4a9275d6c8
11	243	stool	Esch_coli_1190
11	271	stool	NA
11	306	stool	NA
11	330	stool	Esch_coli_1190
11	364	stool	Esch_coli_1190
11	364	stool	Esch_coli_26561
12	0	urt	Esch_coli_28Eco12
12	0	rectal	NA
12	21	stool	NA
12	24	stool	NA
12	24	rot	Esch_coli_LF82
12	24	uot	Esch_coli_LF82
12	40	stool	Esch_coli_LF82
12	49	abx	N
12	49	stool	Esch_coli_LF82
12	84	stool	Esch_coli_LF82
12	112	stool	Esch_coli_LF82
12	140	stool	NA
12	166	stool	Esch_coli_BLK9
12	204	stool	NA
12	234	abx	N
12	239	stool	Esch_coli_FORC_082
12	252	abx	N
12	266	stool	Esch_coli_UM146
12	266	stool	Esch_coli_BLK9
12	300	abx	N
12	301	stool	NA
12	324	stool	NA
12	356	stool	NA
15	0	urine	NA
15	16	stool	Esch_coli_A1_136
15	25	stool	Esch_coli_28Eco12
15	25	rot	Esch_coli_A1_136
15	25	rot	Esch_coli_D5
15	25	uot	Esch_coli_D5
15	36	abx	F
15	43	stool	Esch_coli_A1_136
15	43	stool	Esch_coli_28Eco12
15	57	stool	Esch_coli_A1_136
15	79	stool	NA
15	107	stool	Esch_coli_A1_136
15	135	stool	NA
15	162	stool	Esch_coli_28Eco12
15	196	stool	NA
15	233	stool	NA
15	262	stool	Esch_coli_28Eco12
15	296	stool	NA
15	318	stool	Esch_coli_A1_136
15	351	stool	Esch_coli_A1_136
18	0	rot	Esch_coli_PA45B
18	0	rot	Esch_coli_118UI
18	0	uot	Esch_coli_118UI
18	2	stool	Esch_coli_PA45B
18	2	stool	Esch_coli_118UI
18	6	abx	N
18	13	stool	Esch_coli_118UI
18	27	stool	Esch_coli_118UI
18	41	rop	Esch_coli_PA45B
18	41	rop	Esch_coli_118UI
18	41	urine	NA
18	42	stool	NA
18	48	abx	X
18	55	stool	Esch_coli_118UI
18	70	stool	Esch_coli_118UI
18	84	stool	Esch_coli_118UI
18	115	stool	Esch_coli_118UI
18	152	stool	Esch_coli_PA45B
18	152	stool	Esch_coli_118UI
18	152	stool	Esch_coli_S56
18	187	stool	Esch_coli_S3
18	187	stool	Esch_coli_120899
18	216	stool	Esch_coli_118UI
18	234	abx	B
18	238	stool	Esch_coli_118UI
18	278	abx	B
18	280	stool	Esch_coli_118UI
18	293	stool	Esch_coli_118UI
18	293	rop	Esch_coli_118UI
18	293	rop	Esch_coli_PA45B
18	293	uop	Esch_coli_PA45B
18	299	abx	N
18	300	stool	Esch_coli_118UI
18	313	stool	Esch_coli_118UI
18	322	stool	Esch_coli_118UI
18	322	stool	Esch_coli_MVAST0167
18	370	stool	Esch_coli_MVAST0167
18	370	stool	Esch_coli_PA45B
18	370	stool	Esch_coli_118UI
20	0	rot	Esch_coli_ST2747
20	0	rot	Esch_coli_CFSAN018748
20	0	urt	Esch_coli_LF82
20	18	stool	NA
20	18	rop	Esch_coli_ST2747
20	18	rop	Esch_coli_CFSAN018748
20	18	rot	Esch_coli_ST2747
20	18	rot	Esch_coli_CFSAN018748
20	18	uop	Esch_coli_ST2747
20	18	uop	Esch_coli_CFSAN018748
20	24	stool	NA
20	31	stool	NA
20	45	stool	Esch_coli_ST2747
20	45	stool	Esch_coli_CFSAN018748
20	52	stool	NA
20	61	stool	NA
20	61	rop	Esch_coli_IAI1
20	61	rop	Esch_coli_600468
20	61	urine	NA
20	74	abx	F
20	75	stool	NA
20	81	stool	NA
20	90	stool	NA
20	117	stool	NA
20	137	stool	Esch_coli_118UI
20	137	rop	Esch_coli_118UI
20	137	uop	Esch_coli_118UI
20	142	abx	N
20	153	stool	NA
20	164	stool	Esch_coli_118UI
20	164	stool	Esch_coli_L725
20	171	stool	NA
20	216	stool	NA
20	251	stool	NA
20	284	stool	NA
20	285	rop	Esch_coli_NCTC9066
20	285	rop	Esch_coli_118UI
20	285	rop	Esch_coli_UM146
20	285	rop	Esch_coli_H15
20	285	uop	Esch_coli_UM146
20	285	uop	Esch_coli_1105
20	291	abx	N
20	298	stool	NA
20	311	stool	Esch_coli_UM146
20	311	stool	Esch_coli_1105
20	313	abx	B
20	334	stool	Esch_coli_HS30-1
20	360	stool	Esch_coli_UM146
20	360	stool	Esch_coli_1105
20	360	stool	Esch_coli_S1
23	0	rop	Esch_coli_clone_D_i14
23	0	uop	Esch_coli_clone_D_i14
23	22	abx	M
23	22	stool	NA
23	28	rop	Esch_coli_clone_D_i14
23	28	uop	Esch_coli_clone_D_i14
23	42	abx	F
23	42	stool	NA
23	49	stool	NA
23	56	stool	NA
23	80	abx	N
23	80	stool	NA
23	137	stool	NA
23	155	stool	NA
23	167	stool	NA
23	167	rop	Esch_coli_08-00022
23	167	urine	NA
23	185	stool	NA
23	197	stool	NA
23	212	stool	Shig_dysenteriae_80-547
23	226	stool	Esch_coli_Santai
23	226	stool	Shig_dysenteriae_80-547
23	226	rrp	Shig_dysenteriae_80-547
23	226	rrp	Esch_coli_DSM_103246
23	226	urp	Esch_coli_Santai
23	226	urp	Esch_coli_EC1515
23	239	stool	NA
23	248	stool	Esch_coli_EC1515
23	302	stool	NA
23	310	rop	Esch_coli_Santai
23	310	urine	NA
23	314	stool	Esch_coli_Santai
23	332	stool	Esch_coli_Santai
23	332	stool	Esch_coli_EC1515
24	0	rop	Esch_coli_HB-Coli0
24	0	urine	NA
24	20	stool	Esch_coli_HB-Coli0
24	54	stool	Esch_coli_CFSAN018748
24	54	stool	Esch_coli_Ecol_545
24	90	stool	Esch_coli_C4
24	90	stool	Esch_coli_FDAARGOS_536
24	119	stool	Esch_coli_ST2747
24	119	stool	Esch_coli_L725
24	155	stool	Esch_coli_ST2747
24	181	stool	Esch_coli_CFSAN018748
24	204	stool	Esch_coli_clone_D_i14
24	244	stool	Esch_coli_clone_D_i14
24	266	stool	Esch_coli_clone_D_i14
24	276	rop	Esch_coli_clone_D_i14
24	276	uop	Esch_coli_clone_D_i14
24	277	stool	Esch_coli_clone_D_i14
24	287	abx	X
24	294	stool	Esch_coli_clone_D_i14
24	300	stool	NA
24	313	stool	Esch_coli_clone_D_i14
24	334	stool	Esch_coli_clone_D_i14
24	364	stool	Esch_coli_S1
24	364	stool	Esch_coli_clone_D_i14
24	364	stool	Esch_coli_08-00022
