# Supplementary material for: Longitudinal multi-omics analyses link gut microbiome dysbiosis with recurrent urinary tract infections in women
Source: Springer Nature journal article supplement (doi:10.1038/s41564-022-01107-x), 2022-05-02
Supplement: MOESM8 [file 41564_2022_1107_MOESM8_ESM.xlsx]

## Sheet: S2
ID	Cohort	Faecalibacterium_prausnitzii	Eubacterium_rectale	Roseburia_intestinalis	Roseburia_inulinivorans	Coprococcus_eutactus	Eubacterium_hallii	Anaerostipes_hadrus	Coprococcus_catus	Eubacterium_biforme	Subdoligranulum_variabile	Bacteroides_uniformis	Alistipes_putredinis	Bacteroides_vulgatus	Akkermansia_muciniphila	Prevotella_copri	Dialister_invisus	Phascolarctobacterium_succinatutens	Ruminococcus_obeum	butyrate_Q5	butyrate_Q25	butyrate_Q50	butyrate_Q75	butyrate_Q95	propionate_Q5	propionate_Q25	propionate_Q50	propionate_Q75	propionate_Q95
1	Control	7.44543	6.32056	0.0927069	0.0500338	0	0.0994208	0	0.00426538	0	0	16.5987	9.97681	4.36299	3.55072	0	0	0	0.0414254	2.93011	11.3474	13.5519	17.2473	23.9129	27.352	30.0129	35.6729	39.3653	41.4949
2	Control	6.39188	14.0786	0.295174	0.0523831	0	0.245695	0.0203415	0.0996846	0	0	0.331484	0.451872	4.34211	6.57719	0	0	0	0.178052	4.61018	8.57609	21.6764	32.7426	46.071	2.1988	3.84759	8.36325	11.5138	39.3629
3	Control	0.113911	0.372662	0.615583	0	0	0.00123615	0	0	0	0	0.000743077	0	0.719816	15.1225	0.00137077	0	0	0.0365654	0	0	0	0.33737	5.94831	0.352294	0.59547	1.1187	24.9283	67.7609
4	rUTI	5.19238	0	0.366056	0.903905	0	0	0.02783	0	0	0	7.0015	0	10.959	3.24473	0	4.59148	0	0.16294	1.37784	4.46249	6.7595	9.05494	11.0132	11.2075	16.7908	22.0121	29.8242	56.6752
5	rUTI	4.19531	1.21989	0.0438022	0.102893	0	0.01239	0.00100389	0.00148889	0.00148	0.000188333	17.1431	3.73898	7.07407	1.54764	0	0	0.341494	0.0153533	1.94799	3.86304	5.45534	7.03729	10.3081	18.5816	26.2635	30.243	34.2022	40.3524
6	Control	11.2554	1.58841	3.79557	1.46108	0	0.0403655	0.127665	0.01404	0	0	5.42024	0.118996	8.87169	0.637596	0	0.00637455	0.872235	0.0240936	1.18617	6.12876	7.95724	30.7922	44.7805	5.8401	7.92001	18.421	23.2566	32.4613
7	Control	8.77527	6.01595	1.80191	0.4732	0	0.165253	0.00747154	0.01562	0	0	5.24171	12.3664	2.1173	2.85313	0	1.03131	0	0.244782	6.04337	11.1927	16.0162	19.8114	34.4156	12.5543	20.415	24.7262	29.9642	33.5786
8	rUTI	2.05619	7.00144	0.750114	0.135726	0	0.00530857	0.0274643	0.0257343	0	0	0.0106957	0.00826357	9.31041	2.09834	0	1.56662	0	0.0983936	3.03013	7.50044	10.4304	11.9492	15.4767	9.01654	9.72378	11.2725	13.5183	24.4805
9	Control	9.63599	1.26413	0.00692286	0.420594	0	0.00588286	0	0.00270571	0.0198914	0	2.36045	4.25712	0.778154	9.52387	19.1251	0	4.00368	0.04853	3.35831	5.7271	8.34183	13.7064	25.3928	19.6783	26.4757	33.3585	52.29	70.6995
10	rUTI	2.60502	0.783458	0.136981	0.0791025	0.0278458	0.000183333	0	0.0246542	0	0	19.9063	5.31351	0.00177	8.24225	0	0	0	0.126948	1.57976	2.52804	3.46506	4.34045	6.59746	20.8457	27.5319	32.9706	38.1354	48.8471
11	rUTI	5.6417	0.217513	0.179968	0.0512191	0	0.167214	0.00747364	0.0699464	0	0	4.19405	10.9735	0.00614818	0.597393	0	0	0	0.375875	3.04602	3.95347	5.75375	8.48414	10.0528	9.1819	12.1111	17.7841	19.5327	24.1496
12	rUTI	0.935565	2.42708	0.0488462	0.0765385	0	0.0150115	0.0260377	0.00165077	0	0	5.42638	5.76892	2.69032	0	0	0	0	0.0275631	0.447774	1.84043	3.29715	5.20676	7.30184	10.609	12.2168	13.6841	15.8382	18.0691
13	Control	11.7641	1.61478	0	0.0924862	0	0.113361	0.00834077	0.00822615	0.00951692	0	11.9899	16.5886	3.59409	1.82603	0	0.0157038	0	0.119872	4.25255	6.66457	12.8607	14.9315	29.1138	17.7849	26.5227	33.9734	43.0279	48.9669
14	Control	8.30802	5.30451	2.05417	0.140995	0	0.299845	0.002115	0.010685	0	0	23.5262	14.2822	18.7935	0	0	0	2.45583	0.09094	12.7696	14.2588	16.1203	17.9819	19.4711	55.0112	57.0508	59.6002	62.1497	64.1893
15	rUTI	4.75744	2.73554	1.5072	0.30561	0	0	0.41179	0	0	0	34.4514	0.0465069	0.0102415	0.00465769	0	0.00333308	0	0.0170592	2.78429	3.90295	8.80731	11.8943	20.9168	14.4206	20.5533	38.5534	45.5872	59.2985
16	Control	20.2317	0.788493	0.29598	0.26041	0	0.0957933	0.00412333	0.0253633	0	0	4.87181	0	1.09249	0	19.0805	2.43918	0	0.11587	17.9829	18.9504	20.1598	23.6823	26.5003	22.1503	23.2208	24.559	31.0308	36.2082
17	rUTI	0.0013675	3.48027	0	0.893163	0	0	0	0	0	0	24.0317	0.000345833	0.000783333	0	0	0.247192	0	0	0.713792	0.880635	2.1912	4.81999	14.512	6.67824	18.7835	28.1214	31.6749	40.7336
18	rUTI	8.96416	3.99053	1.16327	0.276226	1.54457	0.0940512	0.00773294	0.0256353	0	0	0.141085	8.90546	6.85655	0.00634176	0	1.07413	0	0.0306335	9.25219	12.9782	15.5124	19.8696	23.4873	13.6107	15.536	17.8296	18.2895	21.0888
19	Control	4.22834	1.00035	0.562967	0.00858167	0	0.0205283	0	0.0114667	0	0	39.5052	0.00585167	0.846152	0.0101142	0	0.0149767	0	0.0576442	0.949947	2.80997	4.1958	7.69819	13.8453	18.4743	30.9072	38.3049	52.1867	63.5303
20	rUTI	7.73622	2.70476	0.486825	0.137231	0	0.10013	0.0026419	0.0218833	0	0	18.6809	12.8203	1.29569	1.44289	0	1.45056	0	0.0522362	3.08734	6.71144	10.7734	13.4451	21.9598	26.1392	29.6704	35.6257	41.2355	45.2299
21	Control	6.82567	3.84535	0.0439527	0.0501645	0	0.0497382	0	0.0096	0	0	25.4442	4.51885	13.7158	3.21179	0	0.000330909	0	0.0506655	6.2038	9.1052	10.0041	12.9256	15.7848	38.6929	42.8145	48.078	50.6651	55.0062
22	rUTI	7.75862	0	0.385633	0.000143333	0	0.0521042	0	0	0	0	0.00131833	0	0	0	0	2.17048	0	0	1.22064	2.21366	6.45202	13.7008	18.8569	0.0030745	0.459857	0.71573	3.61875	6.56854
23	rUTI	0	0.00021125	0	0	0	0	0	0	0	0	33.3717	0	10.6545	3.16574	0	0.386592	0	0	0	0	0	0	0.000845	25.8425	41.288	48.771	55.5085	69.1545
24	rUTI	3.57142	1.36359	0.213558	0.0104643	6.5e-05	0.0271036	0.118104	0	0	0	13.4724	0.000440714	0.000875	0.076	0	1.25497	0	0.0121714	0.896435	1.75744	2.5858	6.21609	17.7166	7.39078	11.1861	11.5458	20.4176	25.8223
25	rUTI	2.21616	0.624269	0.752899	0.068725	0	0.047935	0.0193892	0.00296833	0	0	21.5544	0	0	0.0281775	0	0	0	0.0365117	1.94133	2.54096	3.1673	4.02752	7.24579	8.75976	17.9583	24.0591	26.6901	31.971
26	Control	7.55878	1.70825	0.0201292	0.103859	0	0.128899	0.00854917	0.043575	0	0	12.4606	10.4304	0.0646033	12.7522	0	0.00306417	0	0.0977542	3.54622	7.91731	9.60445	11.4019	14.8724	27.5458	32.1636	36.2244	39.8798	44.4413
27	Control	14.4295	3.77128	0.201083	0.743587	0	0.0110625	0	0.00723917	0	0	10.8687	4.21585	0.0498867	1.18456	0	3.25036	0	0.0420383	9.11233	12.3916	17.3239	23.0644	33.9838	8.52431	11.0104	18.0736	23.3169	43.2377
28	Control	20.4123	1.32073	0.413912	0.22674	0	0.117841	0.017189	0.007827	0	0	0.935087	3.79452	0.796836	0.334088	30.7978	13.802	0	0.068898	7.17186	15.73	21.6023	28.0579	39.8905	13.3277	41.6766	55.657	63.5756	78.4589
29	Control	10.1942	3.00816	0	0.184237	0	0.0773354	0.00542462	0.0383269	0	0	14.7529	7.74954	0.86503	2.03051	6.92308e-05	0.00102692	0	0.0189385	6.6093	8.13433	13.8131	15.07	24.6906	18.1234	20.9998	25.0541	28.5459	36.5198
30	rUTI	5.30814	0.940235	0.471075	1.09329	0	0.016185	0	0.000495	0	0	43.6426	0	2.2601	0	0	0	0	0.021345	7.03044	7.38554	7.82942	8.27329	8.62839	33.1584	39.3253	47.034	54.7426	60.9095
31	Control	3.77263	2.31094	0.177138	0.0530133	0	0.00734333	0.000665833	0	0	0	13.3747	0	4.3495	0	0	0	0	0.024375	1.14404	3.28538	5.28056	7.97815	14.86	12.8739	15.2771	17.8333	19.5776	23.3015
