# Supplementary material for: Longitudinal multi-omics analyses link gut microbiome dysbiosis with recurrent urinary tract infections in women
Source: Springer Nature journal article supplement (doi:10.1038/s41564-022-01107-x), 2022-05-02
Supplement: MOESM10 [file 41564_2022_1107_MOESM10_ESM.xlsx]

## Sheet: S4ab
Group	richness_Q5	richness_Q25	richness_Q50	richness_Q75	richness_Q95	butyrate_Q5	butyrate_Q25	butyrate_Q50	butyrate_Q75	butyrate_Q95
cipro	26.6635	34.6987	39.9167	42.2143	51.0179	1.39477	6.14119	8.7735	9.93088	10.8928
other	32.2708	39.7885	48.9406	50.7711	52.0053	3.58113	4.12533	5.81967	7.73114	14.0988
noabx	38.95	40.75	43	45.5833	47.65	3.729	4.01602	4.3748	5.43248	6.27863
anyabx	27.8458	36.2885	41.6429	50.7419	53.0193	1.942	4.91131	7.08223	9.78868	13.3841
Control	35.1362	44.875	50.375	54.0192	56.524	4.65002	10.5114	13.8116	18.5029	21.9055

## Sheet: S4c
ID	day	event	richness	butyrate_producers	richness_fit	butyrate_fit
5	-20	abx	NA	NA	NA	NA
5	0	stool	33	3.77227	34.7731	4.93572
5	33	stool	35	3.72824	35.4999	5.03816
5	62	stool	42	3.11921	36.1386	5.12818
5	96	stool	42	6.33615	36.8874	5.23372
5	124	stool	43	7.90188	37.5041	5.32063
5	154	stool	24	6.62147	38.1648	5.41376
5	172	abx	NA	NA	NA	NA
5	173	stool	49	7.1759	38.5833	5.47273
5	187	stool	23	10.2853	38.8916	5.51619
5	202	stool	40	5.25381	39.222	5.56275
5	216	stool	50	4.99966	39.5303	5.60621
5	245	stool	25	5.75228	40.169	5.69623
5	285	stool	59	4.13534	41.05	5.8204
5	293	stool	19	0.68603	41.2262	5.84523
5	306	abx	NA	NA	NA	NA
5	307	stool	37	5.65687	41.5346	5.88869
5	313	stool	51	4.51874	41.6667	5.90731
5	320	stool	41	2.17069	41.8209	5.92904
5	348	stool	57	7.86099	42.4376	6.01596
5	369	stool	38	10.4372	42.9001	6.08114
8	-14	abx	NA	NA	NA	NA
8	0	stool	21	10.6219	46.1038	10.0524
8	12	stool	50	8.276	45.8432	10.0484
8	33	stool	51	14.3676	45.3872	10.0415
8	44	abx	NA	NA	NA	NA
8	48	stool	50	7.22507	45.0614	10.0366
8	63	stool	50	16.7253	44.7356	10.0316
8	97	stool	34	2.48039	43.9972	10.0204
8	127	stool	53	7.24192	43.3457	10.0105
8	155	stool	48	10.2388	42.7376	10.0012
8	181	stool	47	10.1051	42.173	9.99267
8	217	stool	59	12.1889	41.3911	9.98079
8	253	stool	41	11.1961	40.6093	9.96891
8	302	stool	12	14.8044	39.5452	9.95274
8	308	abx	NA	NA	NA	NA
8	313	stool	40	3.32615	39.3063	9.94911
8	338	stool	43	11.23	38.7633	9.94087
11	0	stool	55	3.0837	49.125	6.56616
11	26	stool	47	5.48594	49.4175	6.52398
11	60	stool	34	9.7751	49.7999	6.46881
11	73	abx	NA	NA	NA	NA
11	88	stool	47	5.75375	50.1148	6.42338
11	103	stool	65	8.85181	50.2835	6.39905
11	116	stool	53	8.11647	50.4297	6.37796
11	145	stool	54	3.7293	50.7559	6.33091
11	179	stool	59	10.3304	51.1383	6.27574
11	214	stool	38	3.00833	51.532	6.21896
11	301	stool	44	7.37295	52.5105	6.07781
11	335	stool	62	4.17763	52.8929	6.02264
12	-91	abx	NA	NA	NA	NA
12	0	stool	29	0.57413	49.5448	2.95074
12	19	stool	56	0.25824	49.2537	3.02134
12	28	abx	NA	NA	NA	NA
12	28	stool	65	5.25899	49.1159	3.05479
12	63	stool	49	5.90368	48.5797	3.18485
12	91	stool	45	1.84043	48.1508	3.2889
12	119	stool	56	3.77859	47.7218	3.39295
12	145	stool	50	3.29715	47.3235	3.48957
12	183	stool	23	5.20676	46.7414	3.63078
12	213	abx	NA	NA	NA	NA
12	218	stool	64	9.39907	46.2052	3.76084
12	231	abx	NA	NA	NA	NA
12	245	stool	47	1.33275	45.7916	3.86118
12	279	abx	NA	NA	NA	NA
12	280	stool	40	2.71807	45.2555	3.99124
12	303	stool	43	2.76868	44.9031	4.07671
12	335	stool	46	3.56297	44.4129	4.19562
15	-58	abx	NA	NA	NA	NA
15	0	stool	42	6.01986	30.9684	6.93382
15	9	stool	18	9.73632	31.1047	7.10743
15	20	abx	NA	NA	NA	NA
15	27	stool	19	2.39188	31.3773	7.45466
15	41	stool	56	16.993	31.5893	7.72473
15	63	stool	16	3.0459	31.9225	8.14912
15	91	stool	25	7.76006	32.3465	8.68925
15	119	stool	54	11.8943	32.7706	9.22938
15	146	stool	33	3.44326	33.1795	9.75022
15	217	stool	20	15.3162	34.2547	11.1198
15	246	stool	41	3.90295	34.6939	11.6793
15	280	stool	44	26.8026	35.2088	12.3351
15	302	stool	18	10.2149	35.542	12.7595
15	335	stool	45	8.80731	36.0418	13.3961
18	-44	abx	NA	NA	NA	NA
18	0	stool	65	13.1767	45.6415	12.6933
18	4	abx	NA	NA	NA	NA
18	11	stool	50	6.99973	46.0631	12.9033
18	25	stool	37	18.5581	46.5996	13.1707
18	46	abx	NA	NA	NA	NA
18	53	stool	49	12.9782	47.6728	13.7053
18	68	stool	47	10.6322	48.2477	13.9917
18	82	stool	28	10.7223	48.7843	14.259
18	113	stool	65	19.8696	49.9724	14.8509
18	150	stool	46	13.1096	51.3905	15.5574
18	185	stool	55	16.0229	52.7319	16.2257
18	214	stool	33	29.868	53.8434	16.7794
18	232	abx	NA	NA	NA	NA
18	236	stool	61	9.8153	54.6866	17.1995
18	276	abx	NA	NA	NA	NA
18	278	stool	60	21.8921	56.2963	18.0014
18	291	stool	49	21.3344	56.7945	18.2496
18	297	abx	NA	NA	NA	NA
18	298	stool	63	21.0543	57.0628	18.3833
18	311	stool	56	17.9912	57.5611	18.6315
18	320	stool	56	15.5124	57.906	18.8033
18	368	stool	71	13.588	59.7457	19.7198
20	-67	abx	NA	NA	NA	NA
20	0	stool	64	16.1543	51.3403	11.902
20	6	stool	66	12.8468	51.4457	11.871
20	13	stool	65	21.9598	51.5687	11.8349
20	27	stool	62	5.94522	51.8146	11.7625
20	34	stool	29	3.08734	51.9375	11.7264
20	43	stool	36	6.24755	52.0956	11.6799
20	56	abx	NA	NA	NA	NA
20	57	stool	40	31.5915	52.3416	11.6075
20	63	stool	61	7.48026	52.447	11.5765
20	72	stool	59	5.58615	52.6051	11.53
20	99	stool	55	10.1019	53.0793	11.3905
20	119	stool	41	12.9914	53.4307	11.2871
20	124	abx	NA	NA	NA	NA
20	135	stool	42	6.71144	53.7117	11.2045
20	146	stool	67	12.4452	53.9049	11.1476
20	153	stool	35	10.7734	54.0279	11.1114
20	198	stool	52	2.9426	54.8184	10.8789
20	233	stool	58	7.22262	55.4332	10.6981
20	266	stool	59	13.4451	56.0129	10.5275
20	273	abx	NA	NA	NA	NA
20	280	stool	54	11.857	56.2588	10.4552
20	293	stool	58	7.22401	56.4872	10.388
20	295	abx	NA	NA	NA	NA
20	316	stool	63	14.0101	56.8912	10.2692
20	342	stool	63	14.3598	57.3479	10.1348
22	-88	abx	NA	NA	NA	NA
22	0	abx	NA	NA	NA	NA
22	0	stool	20	21.9991	27.5214	14.7421
22	28	stool	28	9.68431	28.0262	13.6629
22	47	abx	NA	NA	NA	NA
22	58	stool	23	13.4244	28.5671	12.5067
22	93	stool	39	1.5613	29.1981	11.1577
22	128	stool	31	10.1862	29.8291	9.8088
22	156	stool	34	3.21974	30.3339	8.72965
22	191	stool	34	14.5298	30.9649	7.38072
22	206	abx	NA	NA	NA	NA
22	210	stool	34	16.286	31.3075	6.64844
22	245	stool	36	2.43111	31.9385	5.2995
22	273	stool	28	1.23872	32.4433	4.22036
22	318	stool	29	1.19855	33.2546	2.48601
22	338	abx	NA	NA	NA	NA
22	338	stool	31	2.59885	33.6152	1.71519
23	-27	abx	NA	NA	NA	NA
23	0	abx	NA	NA	NA	NA
23	0	stool	12	0	13.265	4.17219e-05
23	20	abx	NA	NA	NA	NA
23	20	stool	8	0	14.736	6.39187e-05
23	27	stool	19	0	15.2509	7.16876e-05
23	34	stool	17	0	15.7658	7.94565e-05
23	58	abx	NA	NA	NA	NA
23	58	stool	8	0	17.531	0.000106093
23	115	stool	13	0	21.7234	0.000169354
23	133	stool	36	0	23.0474	0.000189331
23	163	stool	19	0	25.2539	0.000222626
23	175	stool	36	0	26.1365	0.000235944
23	190	stool	34	0	27.2398	0.000252592
23	204	stool	42	0.00338	28.2695	0.000268129
23	217	stool	29	0	29.2257	0.000282557
23	226	stool	36	0	29.8877	0.000292546
23	280	stool	24	0	33.8594	0.000352477
23	292	stool	28	0	34.7421	0.000365795
23	310	stool	31	0	36.066	0.000385772
24	0	stool	44	1.08232	50.2456	7.23157
24	34	stool	49	5.18687	50.3432	6.88342
24	70	stool	42	2.29613	50.4465	6.51479
24	99	stool	54	6.38705	50.5297	6.21783
24	135	stool	59	6.7573	50.633	5.8492
24	161	stool	58	17.1056	50.7076	5.58297
24	184	stool	53	18.8515	50.7736	5.34746
24	224	stool	50	5.7032	50.8884	4.93787
24	246	stool	47	1.73357	50.9515	4.71259
24	257	stool	76	2.60691	50.9831	4.59995
24	267	abx	NA	NA	NA	NA
24	274	stool	37	2.56468	51.0319	4.42588
24	293	stool	59	1.60488	51.0864	4.23132
24	314	stool	34	1.82904	51.1467	4.01629
24	344	stool	49	0.55122	51.2328	3.7091
