# Supplementary material for: Longitudinal multi-omics analyses link gut microbiome dysbiosis with recurrent urinary tract infections in women
Source: Springer Nature journal article supplement (doi:10.1038/s41564-022-01107-x), 2022-05-02
Supplement: MOESM11 [file 41564_2022_1107_MOESM11_ESM.xlsx]

## Sheet: S5
taxname	umb_mean_ra	hmp2_mean_ra	ibd_effect	ibd_pval	ruti_effect	ruti_pval
Bacteroides_uniformis	0.133821	0.178397	0.0707919	0.799801	0.49266	0.184486
Faecalibacterium_prausnitzii	0.0628689	0.195955	-0.348212	0.142956	-0.658888	0.0258555
Bacteroides_vulgatus	0.035306	0.135422	-0.127997	0.642652	-0.480378	0.205071
Bacteroides_stercoris	0.0925511	0.0948245	0.198309	0.46885	0.207084	0.558215
Alistipes_putredinis	0.0458856	0.0705999	-0.542955	0.0584672	-0.456768	0.220421
Bacteroides_ovatus	0.0461039	0.0703717	0.353811	0.161571	0.650003	0.0662842
Bacteroides_dorei	0.046153	0.0675852	-0.0159048	0.953923	0.159297	0.683352
Eubacterium_rectale	0.0273129	0.0629324	-0.378997	0.0680339	-0.603533	0.0440958
Bacteroides_caccae	0.0209676	0.0567855	-0.179907	0.469448	0.135673	0.703702
Bacteroides_fragilis	0.0150863	0.0571014	0.40593	0.120081	0.678461	0.0562894
Roseburia_intestinalis	0.00506322	0.0611331	0.0853454	0.699848	-0.0841817	0.759961
Subdoligranulum_unclassified	0.0375203	0.0369462	-0.92933	0.000128436	-0.694301	0.0722641
Bacteroides_thetaiotaomicron	0.0173778	0.0417886	-0.247724	0.334605	0.544262	0.0945466
Bacteroides_massiliensis	0.0192146	0.0383578	-0.374443	0.231155	-0.851424	0.0208087
Alistipes_onderdonkii	0.0579185	0.0205207	-0.248421	0.356398	-0.0346605	0.926376
Bacteroides_cellulosilyticus	0.011992	0.0362063	-0.336791	0.216196	0.72431	0.034444
Akkermansia_muciniphila	0.0265089	0.0276571	-0.446447	0.0301494	-0.529665	0.0442358
Eubacterium_siraeum	0.0186313	0.0280757	-0.229343	0.36494	0.449811	0.163631
Escherichia_coli	0.00655026	0.0328763	0.601034	0.0516163	-0.241364	0.259562
Parabacteroides_merdae	0.0184385	0.0248491	-0.439402	0.115192	-0.104817	0.786191
Bacteroides_eggerthii	0.0221848	0.017774	-0.394297	0.170263	-0.478563	0.207999
Parabacteroides_distasonis	0.00896624	0.0208692	0.0312447	0.903555	-0.0398691	0.913673
Barnesiella_intestinihominis	0.012164	0.0190966	-0.942993	0.000243857	0.267035	0.464321
Dialister_invisus	0.0100173	0.017354	0.139403	0.577395	-0.124803	0.730393
Bacteroides_coprocola	0.0234669	0.00843074	0.181441	0.646218	0.279104	0.46133
Bacteroides_finegoldii	0.00185387	0.0171234	-0.083586	0.775414	-0.311767	0.453974
Eubacterium_eligens	0.00258264	0.0163728	0.00656042	0.977159	-0.122777	0.657664
Alistipes_shahii	0.0137886	0.00958958	-0.741321	0.00679386	-0.237918	0.516948
Bacteroides_xylanisolvens	0.00124452	0.0138644	-0.25213	0.312187	0.348056	0.261586
Ruminococcus_torques	0.00241646	0.0128636	-0.0986185	0.62029	-0.648174	0.00781008
Veillonella_parvula	0.000175312	0.0136282	0.331049	0.283132	-0.0415918	0.824
Ruminococcus_bromii	0.00294357	0.0120353	-0.623381	0.0244434	-0.111681	0.704899
Parabacteroides_unclassified	0.0136696	0.00732308	0.13546	0.585551	0.0522853	0.877453
Oscillibacter_unclassified	0.00861795	0.00929029	0.414739	0.0327214	-0.210867	0.382418
Odoribacter_splanchnicus	0.00597252	0.00926408	-0.319766	0.236878	-0.136228	0.714052
Clostridium_bolteae	0.00368156	0.00883692	0.654631	0.0569158	-0.0192466	0.947331
Ruminococcus_gnavus	0.000794552	0.00977045	0.541854	0.0264425	0.184097	0.454519
Alistipes_finegoldii	0.0061205	0.00688547	-0.409551	0.142792	0.332443	0.40706
Roseburia_inulinivorans	0.00233282	0.00837642	-0.39368	0.0446631	0.0712278	0.820402
Sutterella_wadsworthensis	0.00289012	0.00754249	-0.798561	0.000306476	-0.0427129	0.901873
Roseburia_hominis	0.00167228	0.00770495	-0.327349	0.15712	0.0592828	0.85795
Bifidobacterium_adolescentis	0.00181751	0.0068341	-0.100662	0.66187	-0.399754	0.198092
Clostridium_clostridioforme	0.000304516	0.00732851	0.569514	0.0486514	0.173953	0.601334
Bacteroides_salyersiae	0.0053412	0.0044311	-0.190857	0.499043	0.00417129	0.990224
Bacteroidales_bacterium_ph8	0.00585577	0.00414124	-0.693615	0.00245133	-1.15998	0.000165652
Bacteroides_faecis	0.00302823	0.00491206	-0.222243	0.432396	-0.447167	0.191969
Bifidobacterium_longum	0.00146842	0.00462235	0.0128482	0.959314	0.199347	0.514406
Dorea_longicatena	0.000787052	0.00420202	0.059513	0.853505	-0.129873	0.688501
Haemophilus_parainfluenzae	0.000356432	0.00425983	-0.0773645	0.635967	0.385282	0.0559993
Veillonella_unclassified	0.000393722	0.0040487	0.124987	0.559362	-0.00456911	0.982516
Lachnospiraceae_bacterium_3_1_46FAA	0.00104671	0.00361855	-0.519906	0.0314258	-0.0385092	0.910456
Clostridium_leptum	0.00145254	0.00317848	-0.265271	0.203652	-0.251396	0.334311
Clostridium_hathewayi	0.000397266	0.00356326	0.275596	0.218677	-0.162019	0.380789
Ruminococcus_obeum	0.000685228	0.00341774	0.145207	0.521848	-0.426158	0.142666
Bilophila_unclassified	0.00331353	0.0021764	-0.465044	0.0512013	-0.656045	0.0323686
Ruminococcus_lactaris	0.000829992	0.00300025	-0.0641101	0.790829	-0.0457483	0.89512
Flavonifractor_plautii	0.00103561	0.00282385	0.563849	0.00792198	0.314301	0.310154
Lachnospiraceae_bacterium_1_1_57FAA	0.000340182	0.00305831	0.00484436	0.981729	-0.167862	0.374992
Collinsella_aerofaciens	0.000920924	0.00232772	-0.026441	0.91288	-0.142396	0.654604
Eubacterium_ventriosum	0.000600093	0.00244992	-0.533702	0.0156949	-0.141264	0.615462
Clostridium_symbiosum	0.000470026	0.00248116	0.467342	0.0383732	0.242116	0.377745
Eubacterium_hallii	0.000596448	0.00237541	-0.214889	0.335257	-0.800447	0.00184517
Parabacteroides_goldsteinii	0.000435165	0.00226978	-0.518034	0.00887421	0.191792	0.602941
Parasutterella_excrementihominis	0.000990317	0.00202261	0.102606	0.678919	-0.674204	0.0297811
Clostridium_nexile	0.00048178	0.00217444	0.169757	0.500335	0.0665948	0.712647
Coprococcus_comes	0.000670126	0.00181025	-0.376298	0.122747	-0.340406	0.22441
Roseburia_unclassified	0.00197618	0.00121905	-0.131682	0.475553	0.310988	0.228383
Lachnospiraceae_bacterium_7_1_58FAA	0.00084172	0.0016713	0.115703	0.63228	-0.214505	0.552186
Burkholderiales_bacterium_1_1_47	0.00041224	0.00179809	0.0994405	0.69401	-0.283536	0.244139
Ruminococcus_callidus	0.000837964	0.00152988	-0.599081	0.0263296	-0.0707859	0.839558
Bacteroides_nordii	0.00251783	0.000747044	-0.188849	0.434162	0.162661	0.675775
Dorea_formicigenerans	0.000221338	0.0016306	-0.26556	0.290479	-0.442661	0.0897217
Lachnospiraceae_bacterium_8_1_57FAA	0.000389811	0.0015116	0.0494022	0.794089	-0.341908	0.0671722
Alistipes_indistinctus	0.000670889	0.00122003	-0.0843773	0.760058	-0.504507	0.172198
Anaerostipes_hadrus	0.00029351	0.0012631	0.0989609	0.663423	0.520082	0.0811105
Bifidobacterium_bifidum	0.000526039	0.00104782	-0.124568	0.574216	-0.284431	0.414892
Escherichia_unclassified	0.00137621	0.000633317	0.199757	0.0872856	-0.137263	0.491526
Ruminococcaceae_bacterium_D16	0.000432387	0.000933495	0.222999	0.43039	-0.425944	0.17247
Clostridium_asparagiforme	0.000299036	0.0008837	0.492734	0.0780183	0.35468	0.211007
Alistipes_senegalensis	0.000623734	0.00070023	-0.401105	0.0140527	-0.790398	0.0252712
Bilophila_wadsworthia	0.000275065	0.000802923	-0.0223862	0.930545	-0.421322	0.208055
Clostridiales_bacterium_1_7_47FAA	0.000122302	0.000868093	0.480192	0.0835729	0.197828	0.514822
Lachnospiraceae_bacterium_5_1_63FAA	0.000108536	0.000861229	-0.143165	0.4639	-0.0486754	0.828662
Clostridium_citroniae	4.80054e-05	0.000858199	0.289889	0.214096	0.0167803	0.941646
Eubacterium_ramulus	0.000220001	0.000774547	-0.402931	0.0800909	0.237443	0.329054
Eubacterium_sp_3_1_31	9.22575e-05	0.000823731	-0.299413	0.277734	0.151671	0.530321
Lachnospiraceae_bacterium_3_1_57FAA_CT1	0.000322431	0.000642679	0.0853949	0.718843	-0.205783	0.282206
Coprococcus_catus	0.000157151	0.000691845	-0.440705	0.0450838	-0.438697	0.108686
Holdemania_filiformis	0.00019454	0.000605407	0.048754	0.835379	-0.0874895	0.794163
Lachnospiraceae_bacterium_2_1_58FAA	4.8373e-05	0.000433147	0.398516	0.166957	-0.0384453	0.882832
Anaerotruncus_colihominis	0.000139922	0.000360543	0.0208034	0.921193	0.251967	0.374077
Clostridiaceae_bacterium_JC118	0.000105329	0.00030513	0.452843	0.0343352	-0.302075	0.285185
Anaerotruncus_unclassified	5.67787e-05	0.000243921	-0.478428	0.00607977	0.0625463	0.681391
Dorea_unclassified	0.000133853	0.000177674	-0.183111	0.369181	0.0522841	0.769287
Eggerthella_unclassified	0.000236314	0.00010323	0.257266	0.200047	-0.044865	0.856759
Pseudoflavonifractor_capillosus	6.80975e-05	0.000173289	0.0645409	0.775616	-0.0452897	0.900394
Holdemania_unclassified	3.07913e-05	0.000110981	0.110136	0.615897	-0.0234594	0.909239
Adlercreutzia_equolifaciens	6.91496e-05	9.12755e-05	-0.42059	0.0141105	-0.537185	0.0285562
