# Supplementary material for: Longitudinal multi-omics analyses link gut microbiome dysbiosis with recurrent urinary tract infections in women
Source: Springer Nature journal article supplement (doi:10.1038/s41564-022-01107-x), 2022-05-02
Supplement: MOESM15 [file 41564_2022_1107_MOESM15_ESM.xlsx]

## Sheet: S9a
ref	pat_count	everinurine	phylogroup	strID
Esch_coli_2013C-4282	1	No	cladeI	1
Esch_coli_ECONIH1	2	No	F	1
Esch_coli_1428	1	No	F	2
Esch_coli_CE10	1	No	F	3
Esch_coli_2012C-4502	2	No	G	1
Esch_coli_MSHS_133	1	No	G	2
Esch_coli_FDAARGOS_144	2	No	B2	1
Esch_coli_SaT040	1	No	B2	2
Esch_coli_SA186	2	No	B2	3
Esch_coli_strain_Z247	2	No	B2	4
Esch_coli_JJ1886	1	No	B2	5
Esch_coli_MVAST0167	1	No	B2	NA
Esch_coli_UM146	3	No	B2	NA
Esch_coli_PA45B	3	No	B2	6
Esch_coli_1105	1	No	B2	NA
Esch_coli_AR_0017	2	No	B2	7
Esch_coli_317	1	No	B2	NA
Esch_coli_536	2	No	B2	NA
Esch_coli_clone_D_i14	8	Yes	B2	8
Esch_coli_LF82	10	Yes	B2	9
Esch_coli_NGF1	1	No	B2	NA
Esch_coli_FDAARGOS_536	1	No	B2	NA
Esch_coli_MCJCHV-1	6	Yes	B2	10
Esch_coli_FHI_NMBU_03	1	No	B2	11
Esch_coli_CFSAN061770	2	No	D	1
Esch_coli_118UI	9	No	D	2
Esch_coli_C4	1	No	D	NA
Esch_coli_EC-1639	1	No	D	3
Esch_coli_CFSAN018748	2	No	D	NA
Esch_coli_ST2747	2	No	D	NA
Esch_coli_Ecol_545	1	No	D	NA
Esch_coli_A1_136	4	Yes	D	4
Esch_coli_28Eco12	2	No	D	NA
Esch_coli_1190	6	No	D	5
Esch_coli_Santai	1	No	E	NA
Esch_coli_EC1515	1	No	E	NA
Esch_coli_DSM_103246	1	No	E	NA
Esch_coli_NCTC9112	1	No	E	NA
Shig_dysenteriae_80-547	2	No	E	NA
Esch_coli_f974b26a-5e81-11e8-bf7f-3c4a9275d6c8	2	No	A	1
Esch_coli_ECONIH4	2	No	A	2
Esch_coli_08-00022	3	No	A	3
Esch_coli_S1	3	No	A	4
Esch_coli_NCTC9066	1	No	A	NA
Esch_coli_ST540_GCF_000597845.1	2	No	A	5
Esch_coli_26561	1	No	A	NA
Esch_coli_1283	1	No	A	NA
Esch_coli_VR50	5	No	A	6
Esch_coli_NCTC9087	3	No	A	7
Esch_coli_NCTC10973	1	No	A	8
Esch_coli_str_TO73	1	No	A	9
Esch_coli_F5505-C1	1	No	A	10
Esch_coli_HS30-1	1	No	A	NA
Esch_coli_14EC001	1	No	A	11
Esch_coli_NCTC9080	6	No	A	12
Esch_coli_FORC_082	1	No	A	NA
Esch_coli_BLK9	1	No	A	NA
Esch_coli_S3	1	No	B1	NA
Esch_coli_L725	3	No	B1	1
Esch_coli_AMSHJX01	1	No	B1	2
Esch_coli_1943	1	No	B1	NA
Esch_coli_120899	1	No	B1	NA
Esch_coli_S42	1	No	B1	NA
Esch_coli_KSC9	1	No	B1	3
Esch_coli_H3	1	No	B1	NA
Esch_coli_HB-Coli0	1	No	B1	NA
Esch_coli_S56	1	No	B1	NA
Esch_coli_H15	1	No	B1	NA
Esch_coli_WAT	1	No	B1	4
Esch_coli_D5	5	Yes	B1	5
Esch_coli_IAI1	2	No	B1	NA
Esch_coli_600468	1	No	B1	NA

## Sheet: S9b
ID	day	event	type
1	0	stool	Esch_coli_LF82
1	0	stool	Esch_coli_D5
1	1	urt	Esch_coli_D5
1	16	stool	Esch_coli_D5
1	42	stool	NA
1	72	stool	Esch_coli_LF82
1	106	stool	Esch_coli_D5
1	136	stool	Esch_coli_D5
1	163	stool	Esch_coli_D5
1	163	stool	Esch_coli_LF82
1	191	stool	Esch_coli_D5
1	226	stool	Esch_coli_LF82
1	226	stool	Esch_coli_D5
1	260	stool	Esch_coli_LF82
1	260	stool	Esch_coli_D5
1	296	stool	Esch_coli_D5
1	296	stool	Esch_coli_LF82
1	324	stool	Esch_coli_D5
1	324	stool	Esch_coli_LF82
1	363	stool	Esch_coli_D5
2	0	stool	Esch_coli_AR_0017
2	0	stool	Esch_coli_118UI
2	1	urt	Esch_coli_A1_136
2	21	abx	M
2	35	stool	NA
2	63	stool	NA
2	98	stool	NA
2	126	stool	NA
2	154	stool	NA
2	190	abx	T
2	190	stool	Esch_coli_NCTC10973
2	203	abx	T
2	217	stool	NA
2	243	stool	NA
2	280	stool	NA
2	314	stool	Esch_coli_NCTC9080
2	341	stool	NA
2	376	stool	Esch_coli_1190
3	0	stool	Esch_coli_1428
3	0	stool	Esch_coli_ECONIH1
3	1	urt	Esch_coli_MCJCHV-1
3	1	urt	Esch_coli_clone_D_i14
3	42	stool	Esch_coli_ECONIH1
3	51	abx	B
3	65	stool	Esch_coli_ECONIH1
3	102	stool	Esch_coli_ECONIH1
3	128	stool	Esch_coli_ECONIH1
3	160	stool	Esch_coli_ECONIH1
3	188	stool	Esch_coli_ECONIH1
3	216	stool	Esch_coli_ECONIH1
3	252	stool	Esch_coli_1428
3	252	stool	Esch_coli_1190
3	282	stool	Esch_coli_ECONIH1
3	314	stool	Esch_coli_1428
3	314	stool	Esch_coli_1190
3	314	stool	Esch_coli_FHI_NMBU_03
3	346	stool	Esch_coli_1190
3	346	stool	Esch_coli_1428
3	378	stool	Esch_coli_1428
3	378	stool	Esch_coli_1190
3	378	stool	Esch_coli_ECONIH1
6	0	stool	Esch_coli_D5
6	15	stool	NA
6	50	stool	NA
6	87	stool	NA
6	142	stool	Esch_coli_SA186
6	198	stool	NA
6	234	stool	NA
6	280	stool	NA
6	295	stool	NA
6	331	stool	NA
6	359	stool	NA
7	-34	stool	NA
7	0	stool	Esch_coli_PA45B
7	29	stool	NA
7	63	stool	Esch_coli_PA45B
7	97	stool	Esch_coli_PA45B
7	126	stool	NA
7	156	stool	Esch_coli_FDAARGOS_144
7	183	stool	Esch_coli_PA45B
7	218	stool	NA
7	258	stool	Esch_coli_NCTC9080
7	282	stool	NA
7	317	stool	Esch_coli_PA45B
7	338	stool	Esch_coli_2012C-4502
9	0	stool	Esch_coli_CE10
9	0	stool	Esch_coli_AMSHJX01
9	22	stool	NA
9	147	stool	Esch_coli_CE10
9	147	stool	Esch_coli_clone_D_i14
9	183	stool	Esch_coli_clone_D_i14
9	183	stool	Esch_coli_D5
9	219	stool	Esch_coli_clone_D_i14
9	247	stool	Esch_coli_NCTC9080
9	247	stool	Esch_coli_CE10
9	274	stool	NA
9	315	stool	NA
9	337	stool	NA
13	0	stool	NA
13	0	urt	Esch_coli_LF82
13	19	stool	NA
13	49	stool	Esch_coli_LF82
13	84	stool	NA
13	110	stool	NA
13	141	stool	NA
13	169	stool	NA
13	201	stool	NA
13	239	stool	Esch_coli_LF82
13	266	stool	Esch_coli_LF82
13	302	stool	NA
13	315	abx	X
13	336	stool	NA
13	356	stool	Esch_coli_KSC9
13	356	stool	Esch_coli_2013C-4282
19	0	rot	Esch_coli_clone_D_i14
19	0	urt	Esch_coli_LF82
19	25	stool	NA
19	31	abx	M
19	52	stool	NA
19	84	stool	Esch_coli_MCJCHV-1
19	117	stool	Esch_coli_MCJCHV-1
19	145	stool	Esch_coli_NCTC9080
19	178	stool	Esch_coli_MCJCHV-1
19	214	stool	Esch_coli_MCJCHV-1
19	237	stool	Esch_coli_MCJCHV-1
19	272	stool	Esch_coli_MCJCHV-1
19	299	stool	Esch_coli_MCJCHV-1
19	328	stool	Esch_coli_MCJCHV-1
19	362	stool	Esch_coli_MCJCHV-1
21	0	rrt	Esch_coli_LF82
21	0	urt	Esch_coli_clone_D_i14
21	20	stool	NA
21	50	stool	NA
21	77	stool	NA
21	113	stool	NA
21	148	stool	NA
21	176	stool	NA
21	212	stool	NA
21	233	stool	Esch_coli_WAT
21	268	stool	NA
21	296	stool	NA
21	330	stool	NA
21	371	stool	Esch_coli_D5
26	0	rop	Esch_coli_NCTC9080
26	0	urine	NA
26	10	stool	Esch_coli_NCTC9080
26	55	stool	Esch_coli_NCTC9080
26	87	stool	Esch_coli_NCTC9080
26	115	stool	Esch_coli_NCTC9080
26	115	stool	Esch_coli_F5505-C1
26	157	stool	Esch_coli_NCTC9080
26	157	stool	Esch_coli_F5505-C1
26	181	stool	Esch_coli_F5505-C1
26	203	stool	NA
26	245	stool	Esch_coli_F5505-C1
26	253	abx	B
26	270	stool	Esch_coli_VR50
26	291	stool	NA
26	335	stool	NA
26	353	stool	NA
27	0	stool	Esch_coli_JJ1886
27	0	stool	Esch_coli_1190
27	0	stool	Esch_coli_SaT040
27	1	rop	Esch_coli_1190
27	1	rop	Esch_coli_JJ1886
27	1	rop	Esch_coli_SaT040
27	1	urine	NA
27	8	stool	Esch_coli_JJ1886
27	8	stool	Esch_coli_1190
27	85	abx	M
27	92	stool	NA
27	106	stool	NA
27	136	stool	NA
27	162	stool	NA
27	198	stool	Esch_coli_strain_Z247
27	226	stool	Esch_coli_FDAARGOS_144
27	268	stool	Esch_coli_FDAARGOS_144
27	304	stool	Esch_coli_FDAARGOS_144
27	316	stool	Esch_coli_FDAARGOS_144
27	352	stool	Esch_coli_FDAARGOS_144
27	352	stool	Esch_coli_str_TO73
28	-1	stool	NA
28	0	rop	Esch_coli_08-00022
28	0	rop	Esch_coli_118UI
28	0	urine	NA
28	14	stool	Esch_coli_f974b26a-5e81-11e8-bf7f-3c4a9275d6c8
28	14	stool	Esch_coli_CFSAN061770
28	41	stool	Esch_coli_118UI
28	79	stool	NA
28	127	stool	Esch_coli_118UI
28	127	stool	Esch_coli_14EC001
28	140	stool	Esch_coli_118UI
28	140	stool	Esch_coli_ST540_GCF_000597845.1
28	163	stool	Esch_coli_118UI
28	163	stool	Esch_coli_L725
28	203	stool	Esch_coli_118UI
28	233	stool	NA
28	289	stool	Esch_coli_118UI
28	289	stool	Esch_coli_ECONIH4
28	317	stool	Esch_coli_118UI
29	0	stool	Esch_coli_2012C-4502
29	0	rop	Esch_coli_2012C-4502
29	0	urine	NA
29	6	stool	NA
29	42	stool	Esch_coli_2012C-4502
29	63	stool	Esch_coli_2012C-4502
29	99	stool	Esch_coli_NCTC9087
29	99	stool	Esch_coli_MSHS_133
29	140	stool	Esch_coli_118UI
29	163	stool	Esch_coli_CFSAN061770
29	197	stool	Esch_coli_118UI
29	222	abx	M
29	225	stool	NA
29	258	stool	NA
29	286	stool	NA
29	318	stool	Esch_coli_EC-1639
29	344	stool	NA
31	0	stool	Esch_coli_PA45B
31	1	rop	Esch_coli_PA45B
31	1	rop	Esch_coli_ST540_GCF_000597845.1
31	1	urine	NA
31	15	stool	Esch_coli_PA45B
31	31	abx	M
31	52	stool	NA
31	78	stool	Esch_coli_PA45B
31	115	stool	NA
31	136	stool	Esch_coli_VR50
31	172	stool	Esch_coli_S1
31	211	stool	NA
31	247	stool	NA
31	264	stool	Esch_coli_VR50
31	306	stool	NA
31	339	stool	Esch_coli_PA45B
